# Supplementary material for: Room-temperature metal-activator-free phosphorescence from mesoporous silica
Source: Royal Society of Chemistry journal article supplement (doi:10.1039/c0cp01981j), 2010-11-26
Supplement: c0cp01981j.pdf [file c0cp01981j.pdf]

## Room-temperature metal-activator-free phosphorescence from mesoporous silica

Lei Zhao, Tian Ming, Huanjun Chen, Li Gong, Jian Chen and Jianfang Wang\*

*Department of Physics, The Chinese University of Hong Kong, Shatin, Hong Kong SAR, China and Instrumental Analysis and Research Center, Sun Yat-sen (Zhongshan) University, Guangzhou 510275, China*

### Electronic Supplementary Information (ESI)

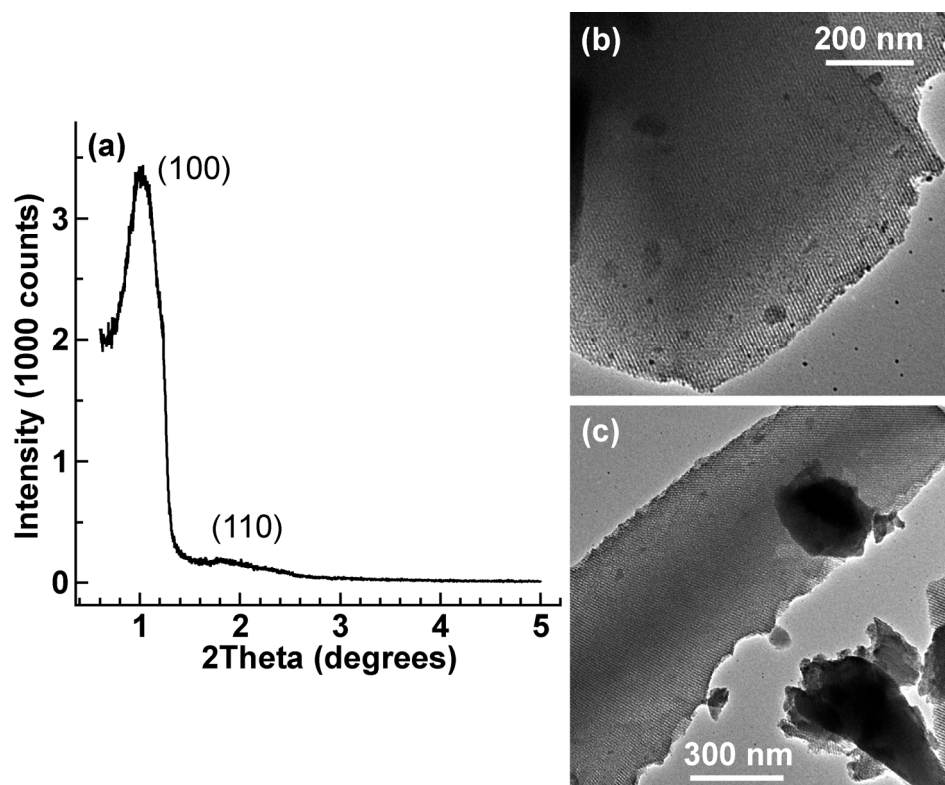

**Fig. S1** Structure of the mesoporous silica obtained from calcination at 800 °C. (a) SAXRD pattern. (b, c) Representative TEM images.

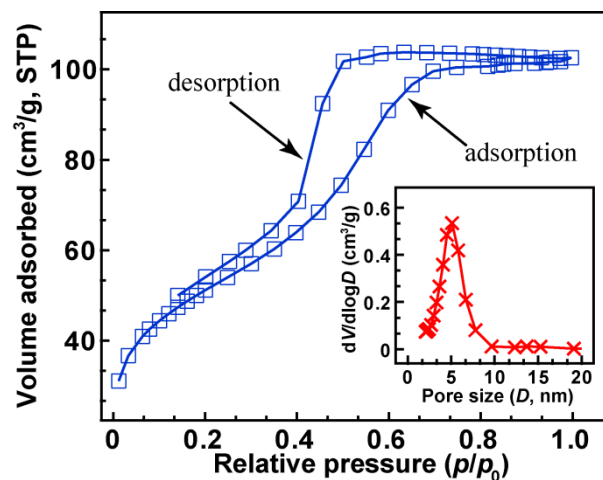

**Fig. S2** N<sub>2</sub> adsorption-desorption isotherm measured on the sample calcined at 600 °C. The inset is the pore size distribution obtained from the adsorption branch.

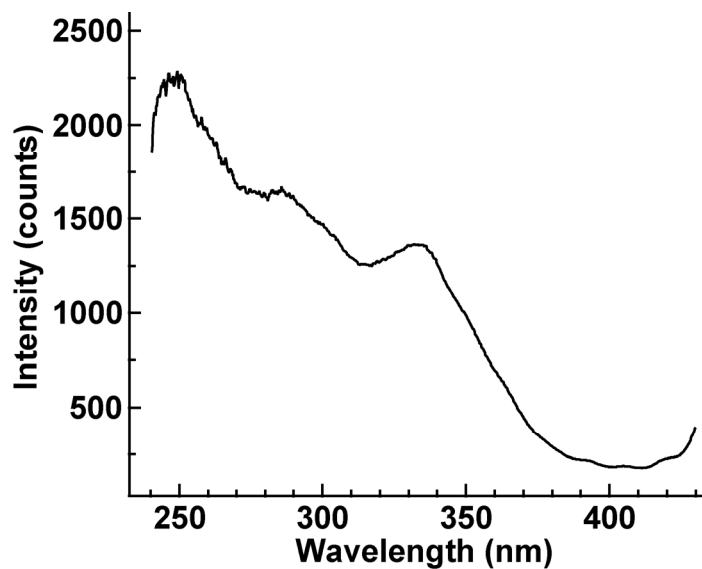

**Fig. S3** PLE spectrum of the mesoporous silica obtained from calcination at 600 °C. The emission was detected at 450 nm.

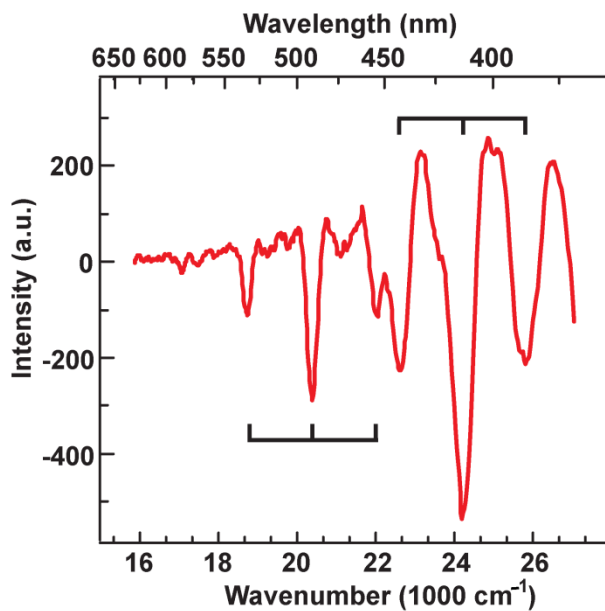

**Fig. S4** Second derivative of the PL spectrum of the mesoporous silica obtained from calcination at 600 °C. The curve has been smoothed.

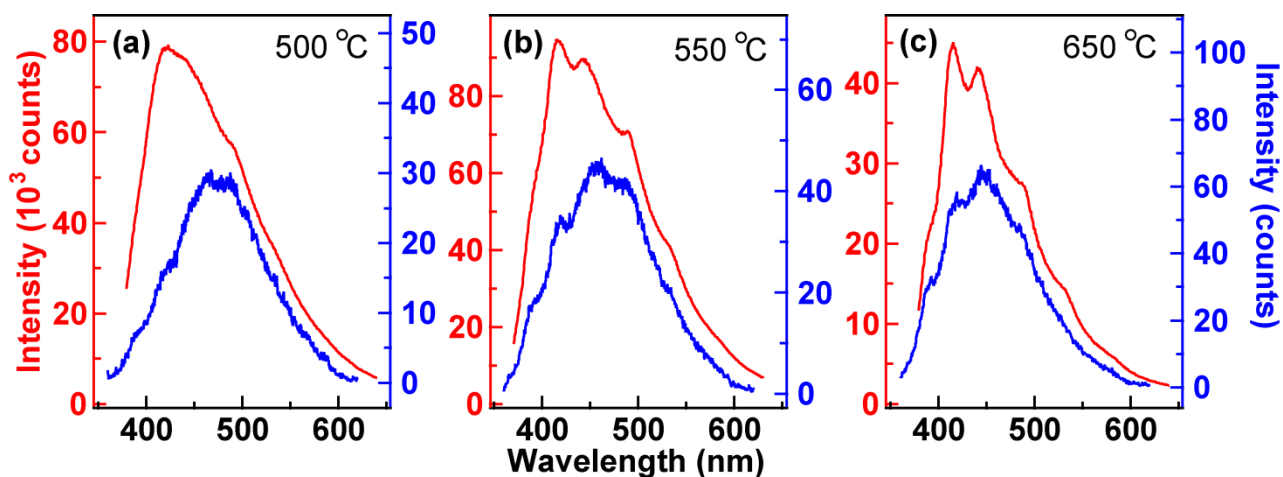

**Fig. S5** PL (red) and phosphorescence (blue) spectra of the mesoporous silica obtained from calcination at (a) 500 °C, (b) 550 °C, and (c) 650 °C.

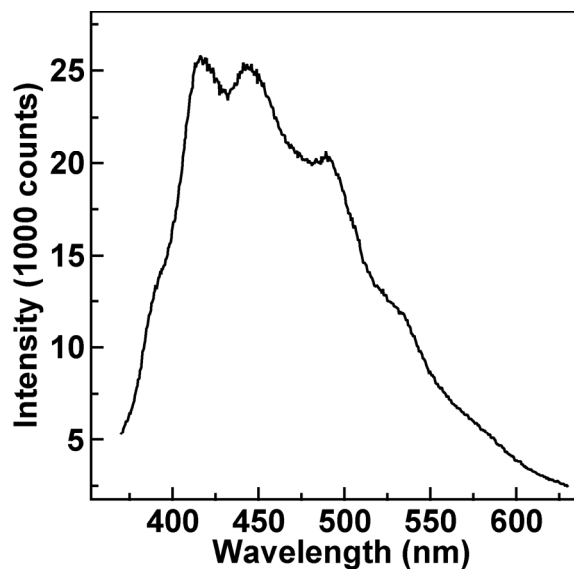

**Fig. S6** PL spectrum of the mesoporous silica monolith shown in Fig. 4a and b.

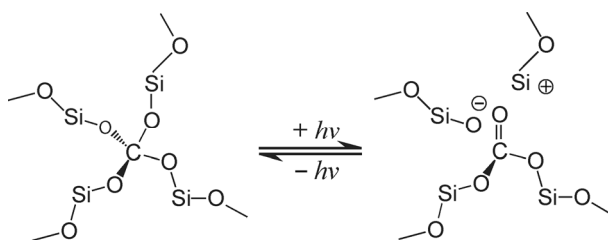

**Fig. S7** Proposed luminescent species in the silicate glass and mesoporous silica.

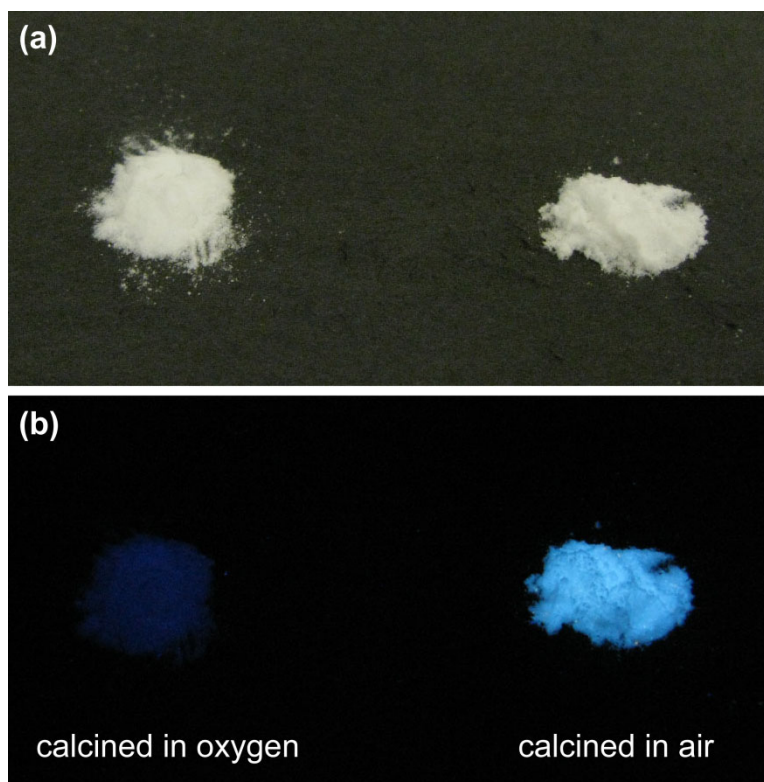

**Fig. S8** Photographs taken (a) under ambient light and (b) under a hand-held ultraviolet lamp at 253.7 nm. The mesoporous silica samples were obtained from calcination at 600 °C in oxygen (left) and in air (right), respectively.

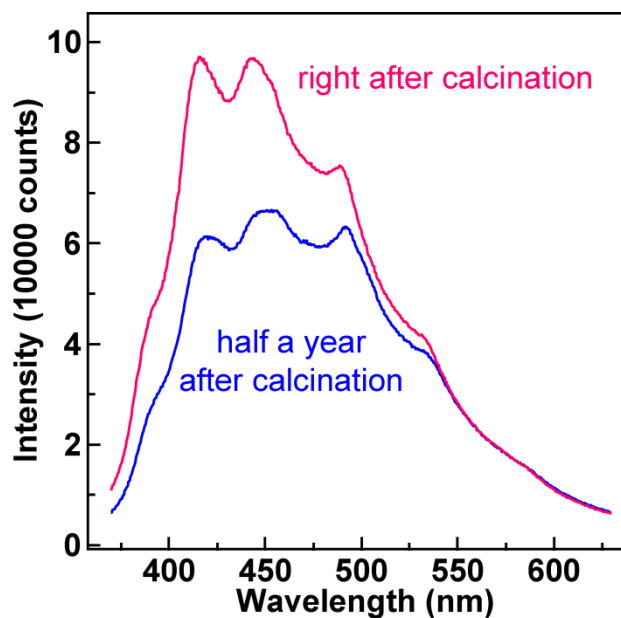

**Fig. S9** PL spectra of the mesoporous silica recorded right after calcination (pink) and half a year after calcination (blue). The calcination was performed at 600 °C.

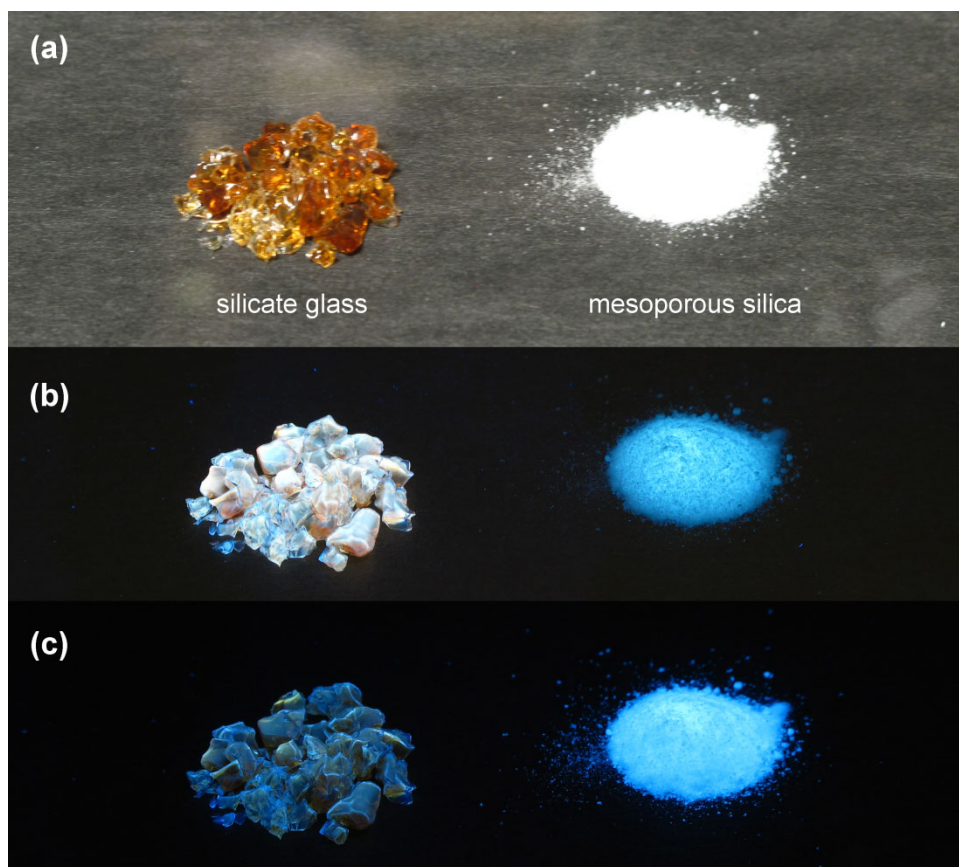

**Fig. S10** Photographs of the silicate glass prepared according to the previously reported procedure (left) and our mesoporous silica (right). The photographs were taken (a) under ambient light, (b) under a hand-held ultraviolet lamp at 365 nm, and (c) under a hand-held ultraviolet lamp at 253.7 nm, respectively.

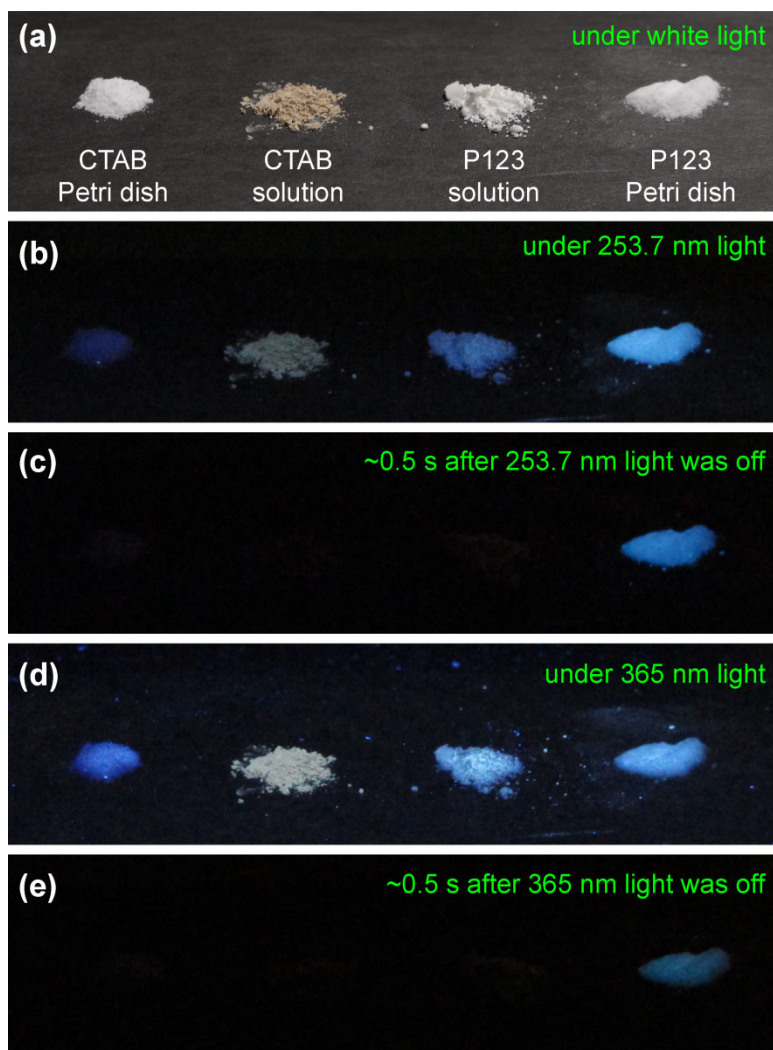

**Fig. S11** Photographs of the mesoporous silica prepared with P123 and CTAB under different conditions. The photographs were recorded (a) under white light, (b) under a hand-held ultraviolet lamp at 253.7 nm, (c) ~0.5 s after the 253.7 nm light was turned off, (d) under a hand-held ultraviolet lamp at 365 nm, and (e) ~0.5 s after the 253.7 nm light was turned off, respectively.
